# Supplementary material for: Efficient Photocatalytic Degradation of Textile Dyeing Cellulosic materials using CeO2 Nanoparticles by Acrylamide Sol gel Route
Source: Research Square preprint supplement (doi:10.21203/rs.3.rs-8722013/v1), 2026-02-05
Supplement: Supplementary file 1 [file 8b8656cc05e6a610d2290e66.docx]

Cerium Oxide-Textiles dyes- Table:

1. **Various dyes structural, Molecular weight and UV-Vis maximum absorbance range**
2. **Effect of Annealing On The Structural Properties Of Cerium Oxide NPs**
3. **Elemental analysis of Cerium Oxide Nps**
4. **Surface Area and Pore Volume of CeO2 samples calcined at different Temperature**
5. **Kinetic constants for the degradation of reactive dyes**

**Table-1 Various dyes structural, Molecular weight and UV-Vis maximum absorbance range**

| **Dye** | **Structure Formula , Molecular weight and UV-Vis maximum absorbance** |
| --- | --- |
| **Reactive Green 19 (RG 19)** | **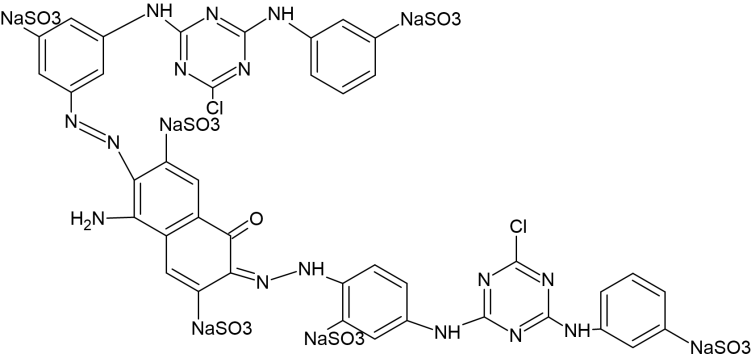 1419.93 / 640 nm**  **Chemical formula: C40H23Cl2N15Na6O19S6** |
| **Reactive Orange 84 (RO-84)** | **1850.25/495nm**  **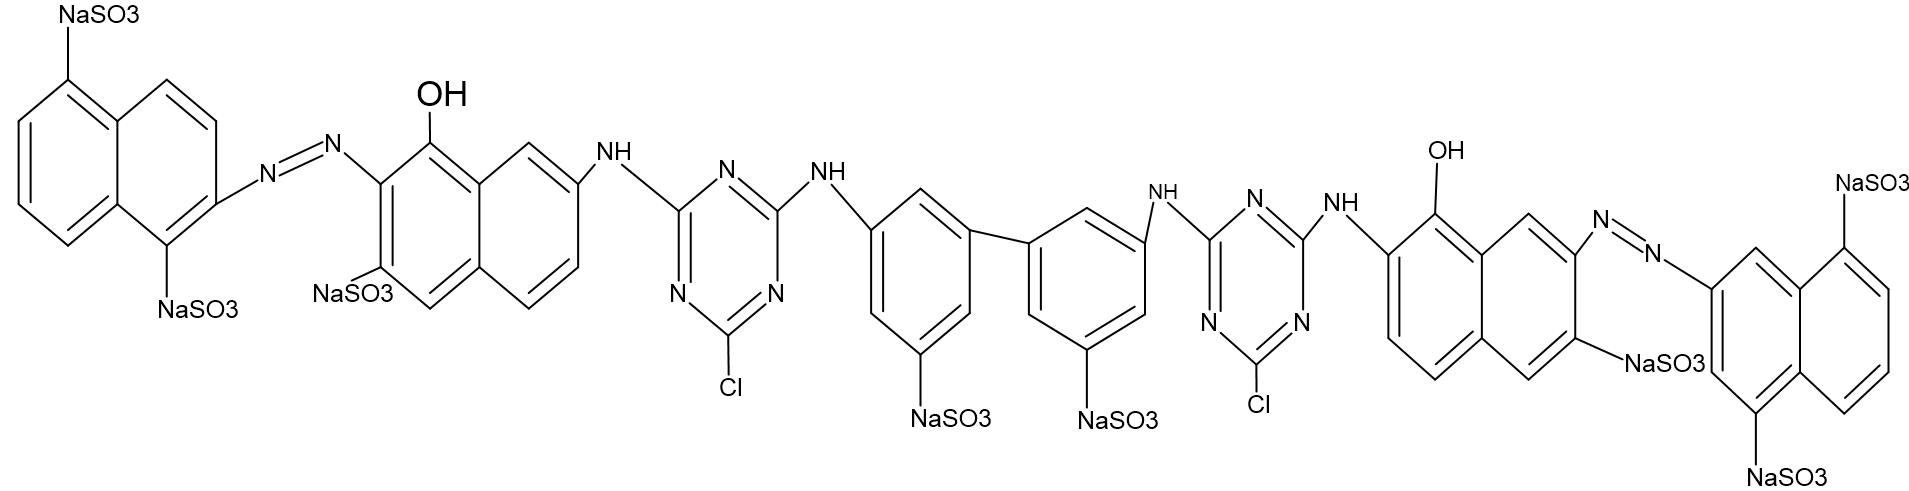**  **Chemical formula: C58H30Cl2N14Na8O26S8** |
| **Reactive Violet 1(RV-1)** | **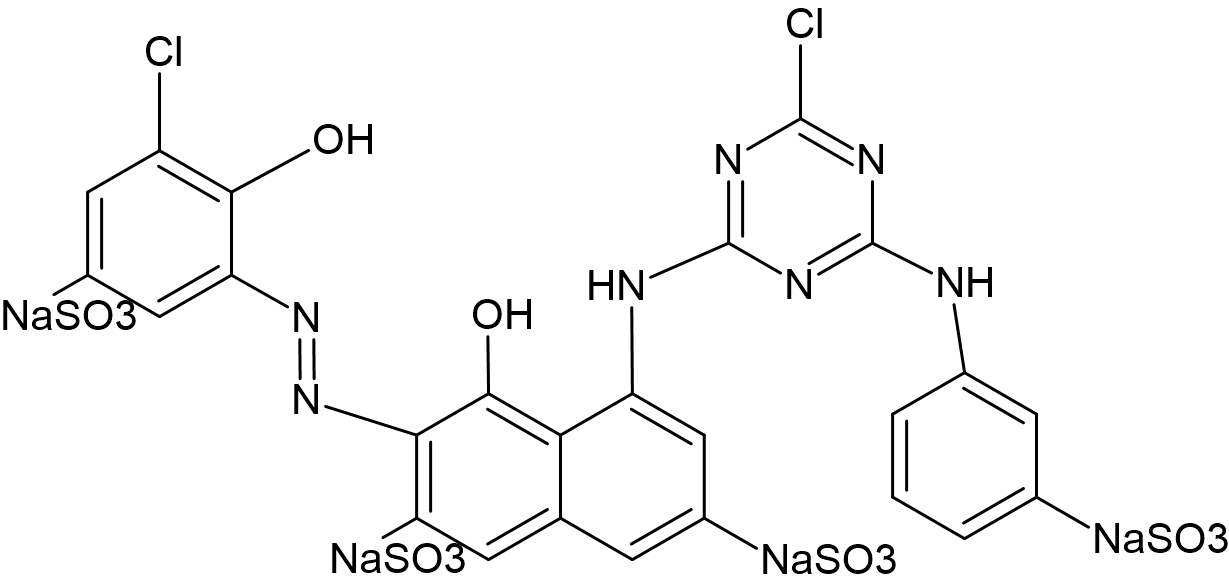 926.51 / 555nm**  **Chemical formula: C25H13Cl2N7Na4O14S4** |

Table: 2 **Effect of Annealing On The Structural Properties Of Cerium Oxide NPs**

| **Temperature**  **(0C)** | **Crystalline size**  **(D) nm** | | **strain (ε)**  **10-3** | **Dislocation density (δ )**  **1015** | **% of crystallinity** |
| --- | --- | --- | --- | --- | --- |
|  | **XRD** | **SEM** |  |  |  |
| **300** | **7** | **8** | **9.13** | **11.6** | **45** |
| **400** | **12** | **14** | **8.05** | **5.10** | **64** |
| **500** | **17** | **19** | **7.20** | **2.77** | **86** |

**Table:3 Elemental analysis of Cerium Oxide Nps**

| **Temperature (0C)** | **Ce** | **O** |
| --- | --- | --- |
| Atomic (%) | |
| **300** | **49.2** | **50.8** |
| **400** | **49.9** | **50.1** |
| **500** | **50.8** | **49.2** |

**Table: 4 Surface Area and Pore Volume of CeO2 samples calcined at different Temperature**

| **Calc Temp (°C)** | **SBET( m2/g)** | **Mean pore size (nm)** | **Mean pore volume(cm3/g** |
| --- | --- | --- | --- |
| 300 | 125 | 9 | 0.036 |
| 400 | 95 | 9.8 | 0.028 |
| 500 | 75 | 10.4 | 0.019 |

**Table: 5 Kinetic constants for the degradation of reactive dyes**

| **Dyes** | **Fixed pH-9** | | **Kapp**  **x 10-3** | **t1/2 Half life** |
| --- | --- | --- | --- | --- |
| **Dye Loading-20mg/L** | **Amount of catalyst-1 g/L** |
| Temperature | Degradation |
| RG19 | 300 | 75 |  |  |
| 400 | 85 |  |  |
| **500** | **93** | **15.3** | **45.30** |
| RO84 | 300 | 73 |  |  |
| 400 | 87 |  |  |
| **500** | **90** | **10.4** | **66.64** |
| RV1 | 300 | 86 |  |  |
| 400 | 88 |  |  |
| **500** | **98** | **8.6** | **80.59** |

Kinetic constant for the degradation of Textile dyes:

| Dyes | First order | Second Order |
| --- | --- | --- |
|  | R2 | R2 |
|  |  |  |
| RG19 | 0.9814 | 0.988 |
| RO84 | 0.9789 | 0.9848 |
| RV1 | 0.9981 | 0.9984 |
